# Supplementary material for: Forecasting the flooding dynamics of flatwoods salamander breeding wetlands under future climate change scenarios
Source: PeerJ journal article supplement (doi:10.7717/peerj.16050), 2023-09-19

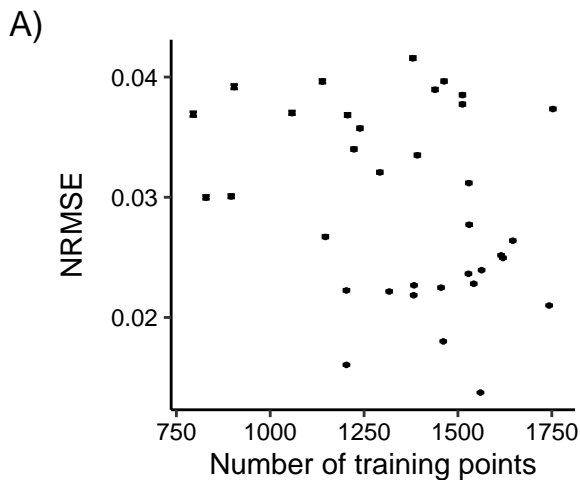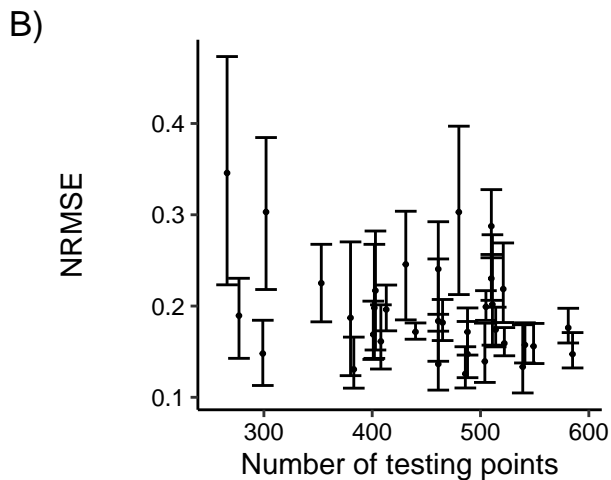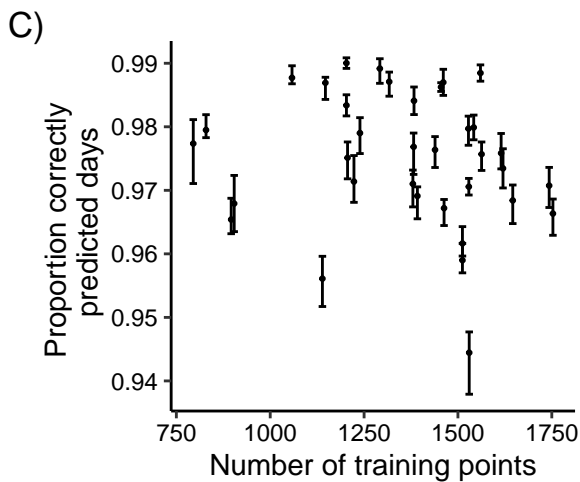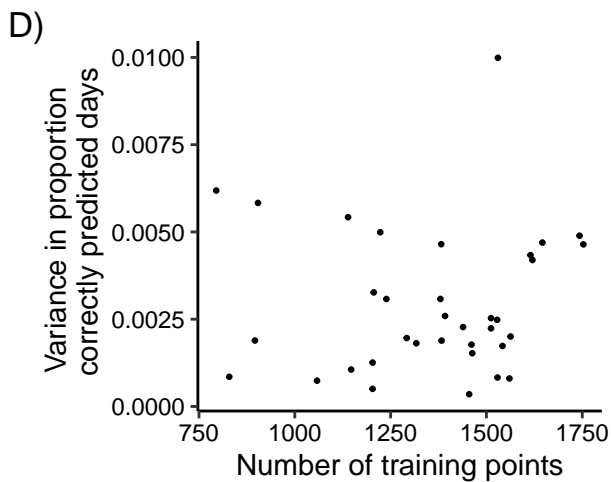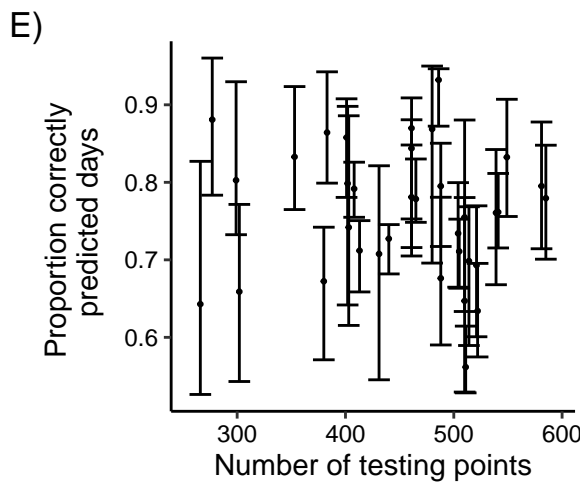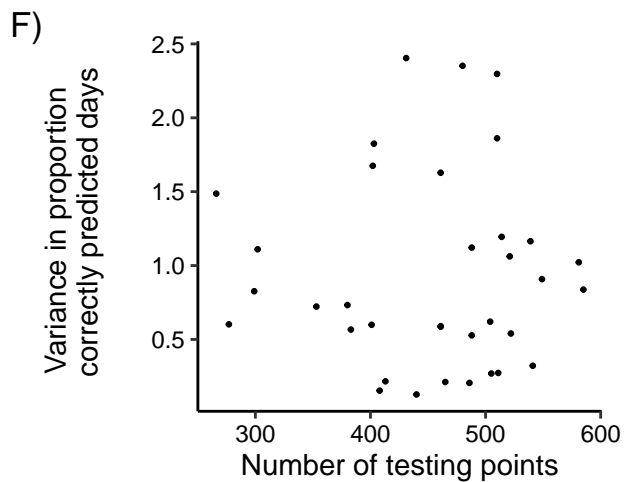

Supplement: Supplementary_Figure_1.pdf [file Supplementary_Figure_1.pdf]
